# Supplementary material for: Repair of Mybpc3 mRNA by 5′-trans-splicing in a Mouse Model of Hypertrophic Cardiomyopathy
Source: PubMed Central journal article supplement — Mol Ther Nucleic Acids. 2013 Jul 2;2(7):e102–. doi: 10.1038/mtna.2013.31 (PMC3731888; doi:10.1038/mtna.2013.31), 2013-07-02
Supplement: mtna201331x1.pdf [file mtna201331x1.pdf]

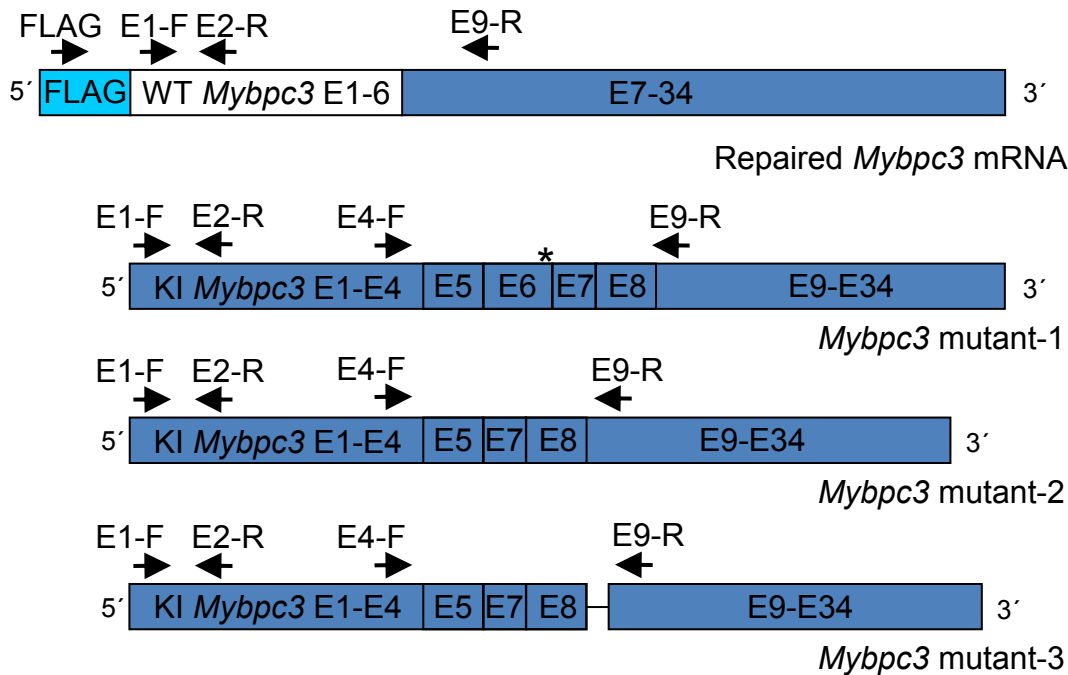

|                               | FLAG/E9-R | E1-F/E9-R | E1-F/E2-R | E4F/E9-R |
|-------------------------------|-----------|-----------|-----------|----------|
| <b>repaired <i>Mybpc3</i></b> | 921 bp    | 896 bp    | 242 bp    | 415 bp   |
| <b>Mutant-1</b>               | na        | 896 bp    | 242 bp    | 415 bp   |
| <b>Mutant-2</b>               | na        | 778 bp    | 242 bp    | 297 bp   |
| <b>Mutant-3</b>               | na        | 824 bp    | 242 bp    | 334 bp   |

**Figure S1 Schematic representations of the repaired and mutant *Mybpc3* mRNAs.** *Mybpc3*-targeted knock-in (KI) mice carry a homozygous G>A transition on the last nucleotide of exon 6. This mutation gives rise to 3 different mutant mRNAs. Mutant-1 mRNA (missense) contains the G>A transition (\*). Mutant-2 mRNA (nonsense) results from the skipping of exon 6. Mutant-3 mRNA (deletion/insertion) results from the skipping of exon 6 and retains a part of intron 8. The arrows indicate the position of primers used. The predicted size of PCR products is given in the table below. Abbreviations: E, exon; F, forward; R, reverse; na, not amplified.

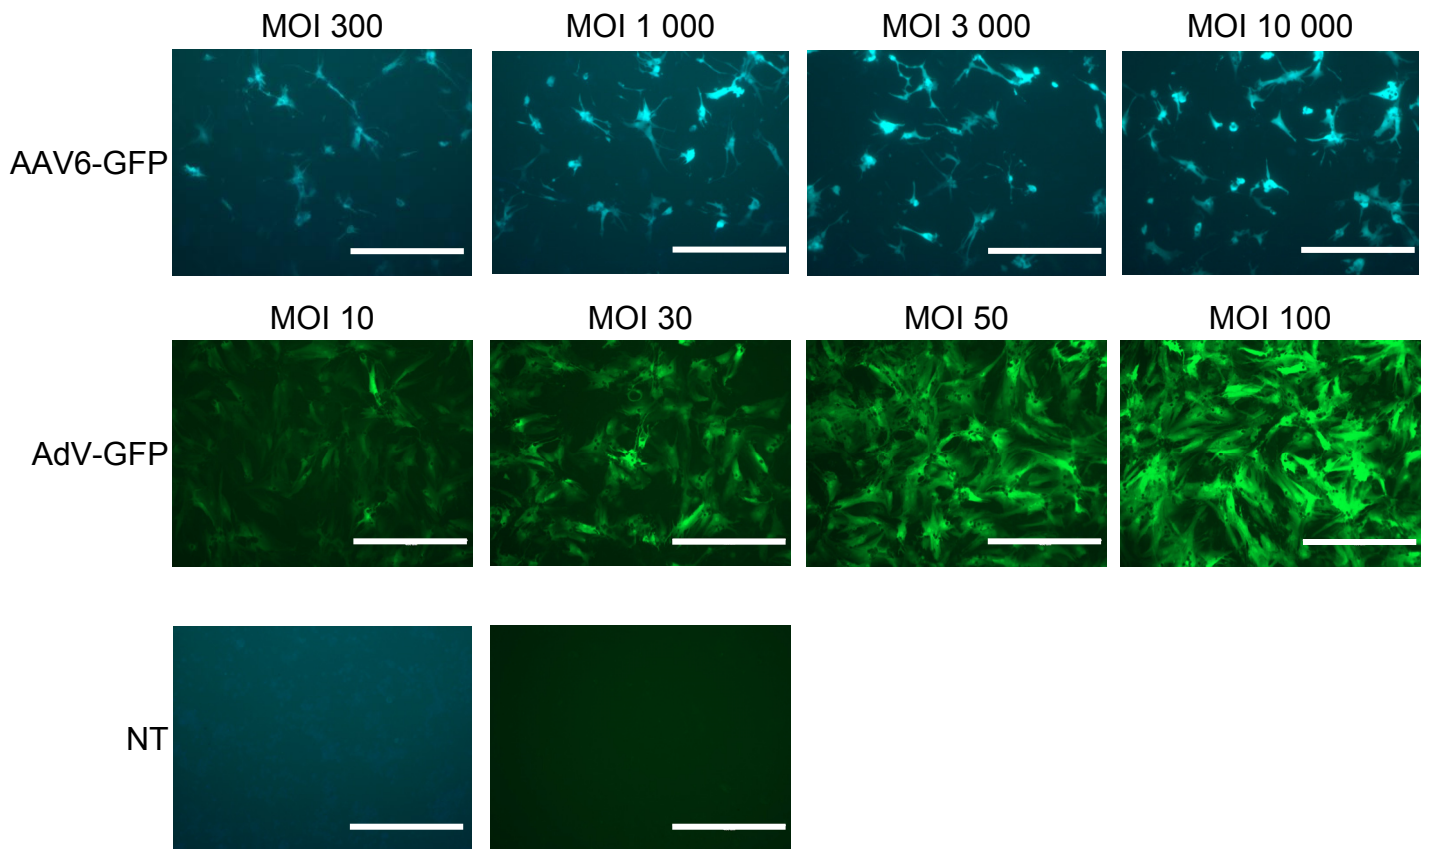

**Figure S2 Efficiency of AAV6- and AdV-mediated transduction in *Mybpc3*-targeted knock-in cardiac myocytes.** Cardiac myocytes were isolated from KI neonatal mice and transduced with different MOIs of adeno-associated virus serotype 6 (AAV6) or adenovirus (AdV), both encoding GFP under the control of human cardiac troponin T promoter (*TNNT2*). GFP expression was evaluated by epifluorescence microscopy with a 10x objective 4 days post-transduction and compared to non-transduced (NT) cardiac myocytes. These data show that about 80% of cells were green after AAV6-mediated transduction with a MOI of 3 000 and 100% after AdV-mediated transduction with a MOI of 100. Scale bar 400  $\mu$ m.

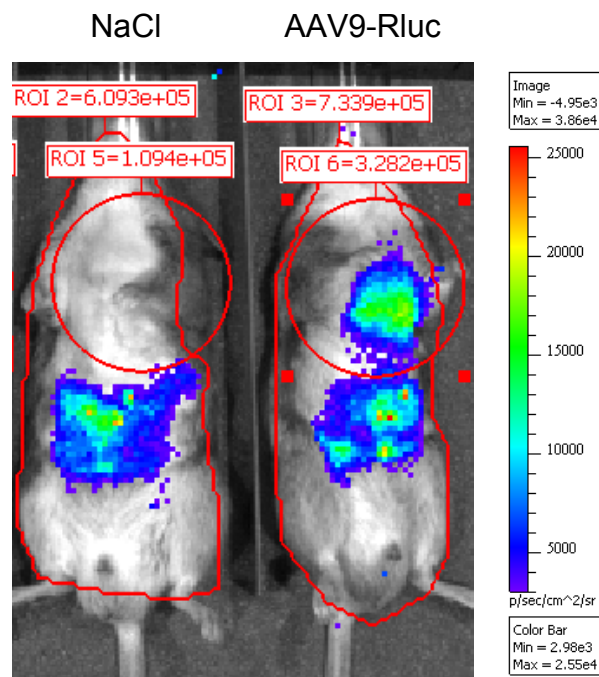

**Figure S3 *In vivo* bioluminescence imaging.** *In vivo* bioluminescence imaging was performed 28 days after *i.p.* injection of 2.5 mg/kg body weight luciferase substrate (coelenterazine) in mice. Light emission was recorded specifically in the heart of the mouse that received AAV9-RLuc. The positive signal at the site of *i.p.* injection in both NaCl- and AAV9-RLuc-injected mice corresponded to autofluorescence of the substrate. Images were taken 28 days after injection. Abbreviations: *i.p.*, intraperitoneal; ROI, region of interest.

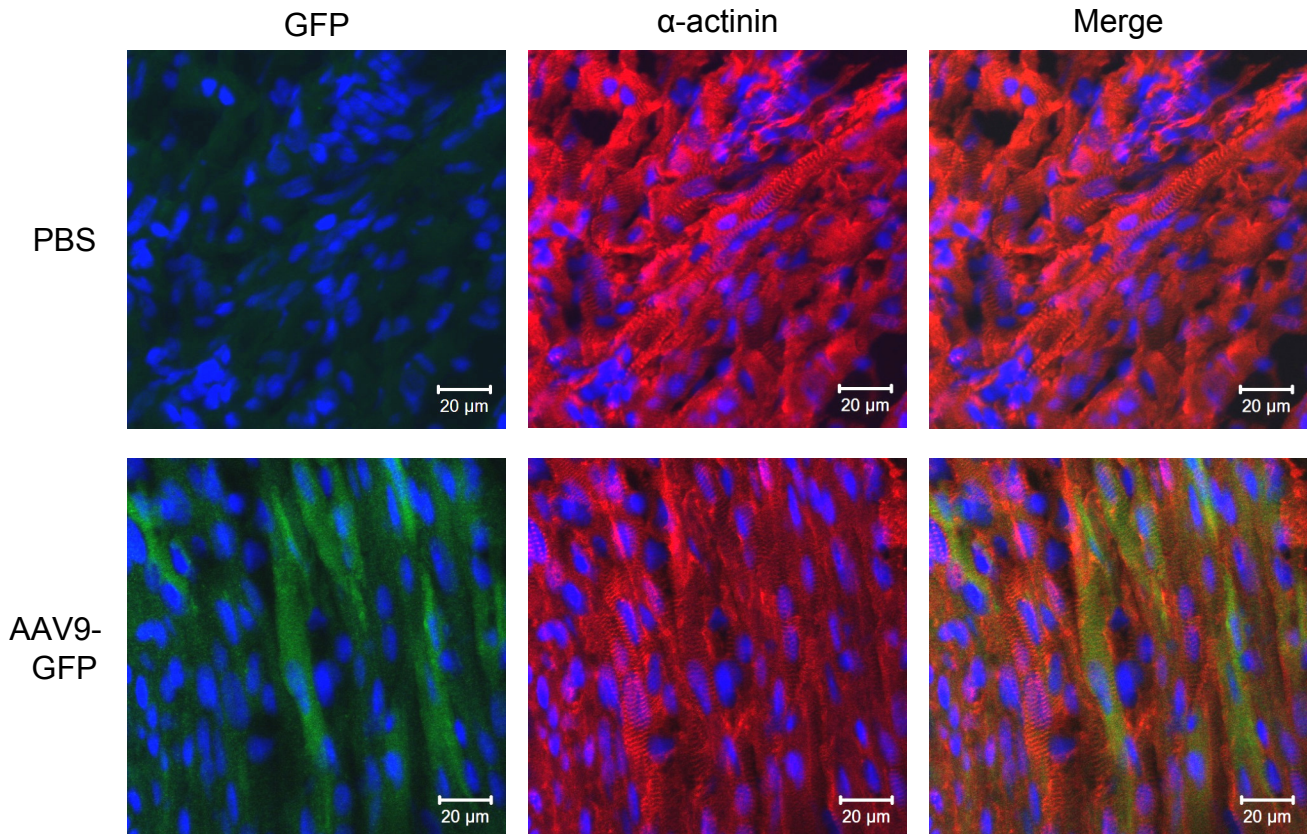

**Figure S4 Efficiency of transduction after systemic administration of AAV9-GFP in a *Mybpc3*-targeted knock-in mouse.** AAV9-GFP ( $1.5 \times 10^{14}$  vg/kg body weight) was administered into the temporal vein of 1-day-old KI mouse for 7 days. Another KI mouse received the same volume of PBS and was used as control. The hearts were extracted and, after rinsing in KCl, embedded in Tissue-Tek®. Cryosection of 10  $\mu\text{m}$  thickness were cut and stained with primary antibodies directed against GFP (1:200, Santa Cruz) and  $\alpha$ -actinin (1:800, Sigma) and with the secondary antibodies anti-rabbit Alexa 488 (1:600, Molecular Probes) and anti-mouse Alexa Fluor 546 (1:600, Molecular Probes). Nuclei were stained with DRAQ5™ (1:800). After embedding in Mowiol, immunofluorescence analysis was performed by confocal microscopy with a 40x-oil objective.

After 7 days of transduction GFP-positive cardiac myocytes were detected in the entire section of the AAV9-CMV-GFP-injected mouse but not in the PBS-injected mouse. This suggests very high cardiac transduction efficiency with, and therefore confirms the high cardiac tropism of AAV9.

We thank V. Behrens-Gawlik (Pharmacology, UKE, hamburg) for taking the images.

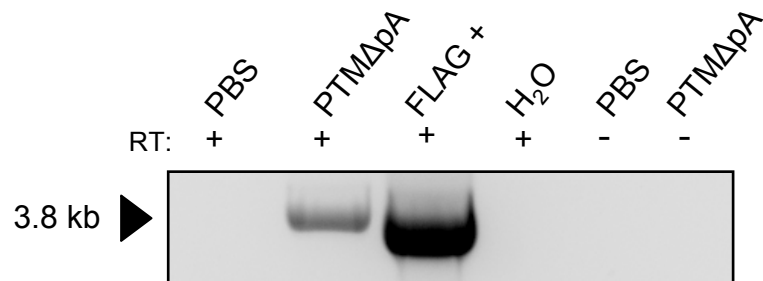

**Figure S5 Detection of full-length repaired *Mybpc3* mRNA.** The cardiac cDNA obtained from a mouse transduced with AAV9-PTM $\Delta$ pA or PBS for 7 weeks was amplified with FLAG and *Mybpc3* exon 33 primers. A fragment (3.8 kb) was detected only in the AAV9-PTM $\Delta$ pA-injected mouse and in the positive control (FLAG +), but not in PBS-injected mouse or in the amplifications from samples without reverse transcriptase (-).

| <b>Binding domain (BD)</b> | <b>Sequence (5´ to 3´)</b>                                                                                                                                             | <b>Size (nt)</b> |
|----------------------------|------------------------------------------------------------------------------------------------------------------------------------------------------------------------|------------------|
| <b>BD1</b>                 | cagcccaagctgacctctagagtcgaccacagctagtcaccctctctagttgggaga<br>tagagacaagcccaagggaccaggaccatgaagaccacaagacca                                                             | 104              |
| <b>BD2</b>                 | ggaacccttaatataacttcgtataatgtatgctatacgaagtattaggtccctcgacct<br>gcagcccaagctgacctctagagtcgaccacagctagtcaccctctctagttgggag<br>a                                         | 120              |
| <b>BD3</b>                 | tgaggcagtttctcatctcagctccacagtgaggctgcctcccactcacctcccagttca<br>cattcaaactgtgtgaggcagggacacagaaacagcatcccaccctgacttgctcc<br>cacgattctcctgaaagcatgcatttcgttcacacctg     | 156              |
| <b>Reverse BD1</b>         | tggctctgtggtcttcatgggtcctggccttgggctgtctctatctccaactagagag<br>ggtgactagctgtggctgactctagaggatcagcttgggctg                                                               | 104              |
| <b>Reverse BD2</b>         | tctccaactagagaggggtgactagctgtggctgactctagaggatcagcttgggctg<br>caggtcgagggacctaataacttcgtatagcatacattatacgaagtatattaagggtt<br>cc                                        | 120              |
| <b>Reverse BD3</b>         | cgaggtgtgaacgaaatgcatgctttcaggagaatcgtagggagcaagtcaaggggtg<br>ggatgctgtttctgtgtccctgcctcacacagttgaatgtgaactgggaggtgagtgagg<br>aggcagcccactgtggagactgagatgagaaactgcctca | 156              |

**Supplementary Table S1 Sequences of the binding domains.** Sequences of the different binding domains (BD1 to BD3) that are complementary to intron 6 of *Kl Mybpc3* and of the reverse binding domains (reverse BD1 to BD3), which do not base-pair with intron 6. Abbreviation: nt, nucleotide.

| <b>Primer</b>       | <b>Sequence (5' to 3')</b>                                                |
|---------------------|---------------------------------------------------------------------------|
| FLAG                | GGATTACAAGGATGACGACGA                                                     |
| E1-F                | CCTGGTGTGACTGTTCTCAA                                                      |
| E2-R                | GTCATCAGGGCTCGCATC                                                        |
| E4-F                | TCTTTCTGATGCGACCACAG                                                      |
| E9-R                | TCCAGAGTCCCAGCATCTTC                                                      |
| E33-R               | TGCGGAAGCGAGCATCTT                                                        |
| <i>Luciferase F</i> | GTAACGCTGCCTCCAGCTAC                                                      |
| <i>Luciferase R</i> | CCAAGCGGTGAGGTACTIONTGT                                                   |
| <i>Myh6 F</i>       | CTCAAGCTCATGGCTACACTCTTCTC                                                |
| <i>Myh6 R</i>       | AGAGCAGACACTGTTTGAAGGA                                                    |
| <i>Gapdh F</i>      | ATTCAACGGCACAGTCAAG                                                       |
| <i>Gapdh R</i>      | TGGCTCCACCCTTCAAGT                                                        |
| PTM F               | TTCGACCTCGAGATGGATTACAAGGATGACGACGATAAGCCTG<br>GTGTGACTGTTCTCAA           |
| PTM R               | TTCGACGGATCCAGGCCAACCCATGGAAAGAAAGAGCTGTAC<br>TCACCATGGACAGTGAGGTTGAAGTTA |
| BD F                | TTCGACGGATCCTCTCCCACTAGAGAGGGTGA                                          |
| BD R                | TTCGACGCGGCCGCGGAACCCTTAATATAACTTCGTATAATG                                |
| BD-R F              | TTCGACGGATCCGGAACCCTTAATATAACTTCGTATAATG                                  |
| BD-R R              | TTCGACGCGGCCGCTCTCCCACTAGAGAGGGTGA                                        |
| <i>TNNT2 F</i>      | GCATCAGTTCAAGTGGAGCA                                                      |
| <i>TNNT2 R</i>      | GGGACAAGGCTACAGGAACA                                                      |

**Supplementary Table S2 Sequences of the PCR primers used in the present study.** Sequences are given from 5' to 3'.

| Age at Echo |                 | LVM/BW (mg/g) | FAS (%) |
|-------------|-----------------|---------------|---------|
| 11-wk-old   | NaCl            | 6.22          | 31.52   |
| 11-wk-old   | PTM $\Delta$ pA | 6.01          | 20.87   |
| 11-wk-old   | RLuc            | 5.29          | 27.90   |
|             |                 |               |         |
| 7-wk-old    | PBS             | 5.37          | 28.07   |
| 7-wk-old    | PTM $\Delta$ pA | 6.55          | 22.22   |

**Supplementary Table S3 Echocardiographic analysis.** Echocardiographic analysis was performed 4 or 7 weeks after AAV9- and NaCl- or PBS- injections in 7-week-old or newborn mice, respectively. Left ventricular mass to body weight ratio (LVM/BW) and fractional area shortening (FAS) are listed.
